# Supplementary material for: Enhancement of near-infrared luminescence of ytterbium in triple-stranded binuclear helicates
Source: Royal Society of Chemistry journal article supplement (doi:10.1039/c5cp05888k), 2015-01-01
Supplement: c5cp05888k1.pdf [file c5cp05888k1.pdf]

## Supplementary Information

# Enhancement of near-infrared luminescence of ytterbium in triple-stranded binuclear helicates

Bing Li, Hongfeng Li,\* Peng Chen, Wenbin Sun, Cheng Wang, Ting Gao and Pengfei Yan\*

Key Laboratory of Functional Inorganic Material Chemistry (MOE), P. R. China; School of Chemistry and Materials Science, Heilongjiang University; No. 74, Xuefu Road, Nangang District, Harbin 150080, P. R. China.

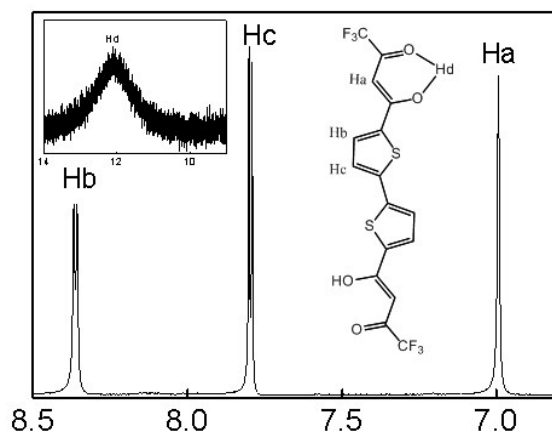

Figure S1 400 MHz <sup>1</sup>H NMR spectrum of BTT in CDCl<sub>3</sub>

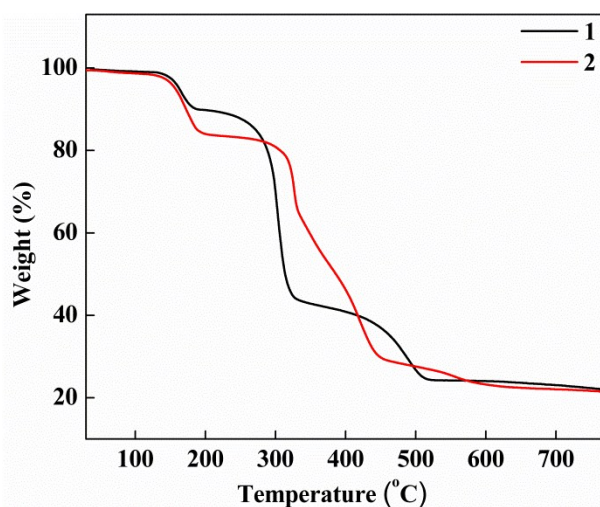

Figure S2 Thermogravimetric curves of 1 and 2.

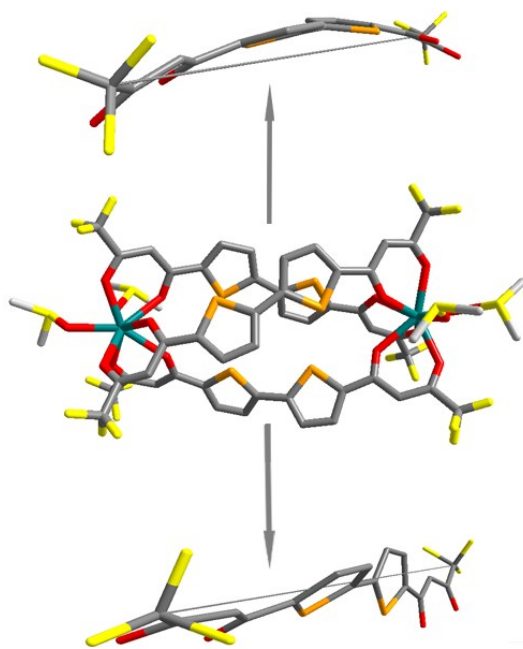

**Figure S3** The bending patterns of the ligands in **2**.

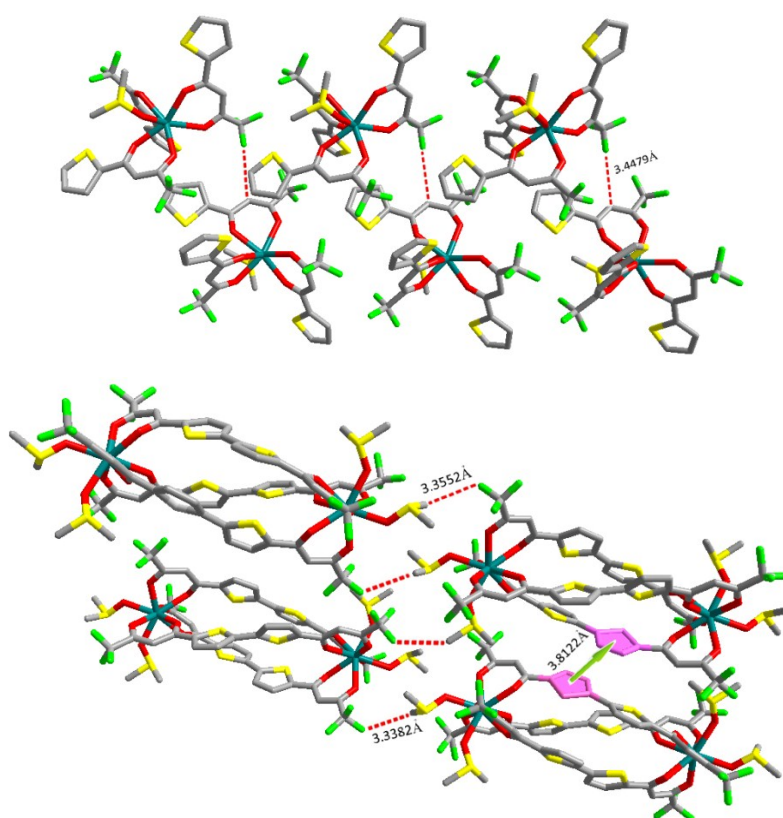

**Figure S4** Intermolecular C-H...F and  $\pi$ ... $\pi$  interactions in **1** and **2**.

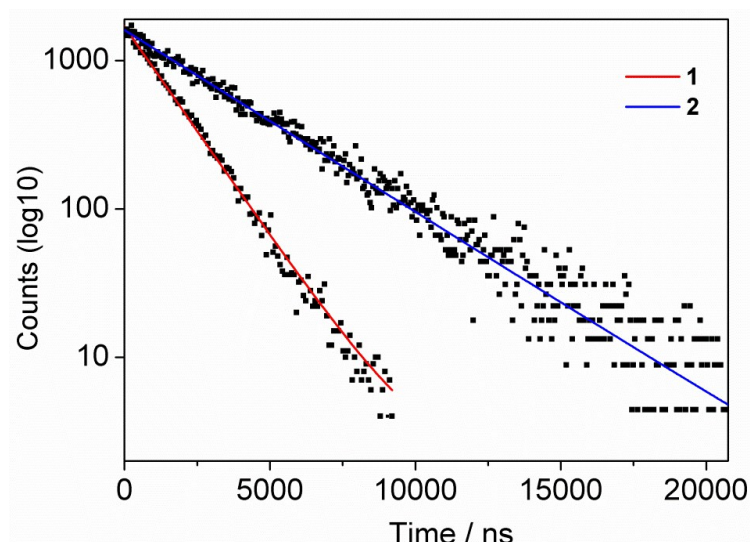

**Figure S5** Luminescence decay curves of **1** and **2** monitored at 975 nm.

**Table S1** Crystal data and structure refinement for **1** and **2**.

|                                                               | <b>1</b>                                                                        | <b>2</b>                                                                                        |
|---------------------------------------------------------------|---------------------------------------------------------------------------------|-------------------------------------------------------------------------------------------------|
| formula                                                       | C <sub>26</sub> H <sub>18</sub> F <sub>9</sub> O <sub>7</sub> S <sub>4</sub> Yb | C <sub>60</sub> H <sub>54</sub> F <sub>18</sub> Yb <sub>2</sub> O <sub>18</sub> S <sub>12</sub> |
| Mr                                                            | 914.68                                                                          | 2135.83                                                                                         |
| color                                                         | colorless                                                                       | yellow                                                                                          |
| cryst syst.                                                   | orthorhombic                                                                    | monoclinic                                                                                      |
| space group                                                   | <i>P</i> 2 <sub>1</sub> 2 <sub>1</sub> 2 <sub>1</sub>                           | <i>C</i> 2/ <i>c</i>                                                                            |
| <i>a</i> (Å)                                                  | 10.9140(3)                                                                      | 41.711(6)                                                                                       |
| <i>b</i> (Å)                                                  | 11.4933(5)                                                                      | 11.812(17)                                                                                      |
| <i>c</i> (Å)                                                  | 26.0098(10)                                                                     | 16.553(2)                                                                                       |
| $\alpha$ (deg)                                                | 90                                                                              | 90                                                                                              |
| $\beta$ (deg)                                                 | 90                                                                              | 98.582(3)                                                                                       |
| $\gamma$ (deg)                                                | 90                                                                              | 90                                                                                              |
| <i>V</i> (Å <sup>3</sup> )                                    | 3262.6(2)                                                                       | 8064(2)                                                                                         |
| <i>Z</i>                                                      | 4                                                                               | 4                                                                                               |
| $\rho$ (g cm <sup>3</sup> )                                   | 1.862                                                                           | 1.759                                                                                           |
| $\mu$ (mm <sup>-1</sup> )                                     | 3.216                                                                           | 2.719                                                                                           |
| <i>F</i> (000)                                                | 1780                                                                            | 4208                                                                                            |
| <i>R</i> <sub>1</sub> , [ <i>I</i> > 2 $\sigma$ ( <i>I</i> )] | 0.0519                                                                          | 0.0577                                                                                          |

|                           |        |        |
|---------------------------|--------|--------|
| $wR_2, [I > 2\sigma(I)]$  | 0.1025 | 0.1365 |
| $R_1, (\text{all data})$  | 0.0635 | 0.1031 |
| $wR_2, (\text{all data})$ | 0.1091 | 0.1633 |
| GOF on $F^2$              | 1.102  | 0.992  |

**Table S2** Distance of metal centres to C–H bonds

| Complexes      | 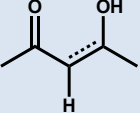 |  |  |                     |                     |
|----------------|-----------------------------------------------------------------------------------|-----------------------------------------------------------------------------------|------------------------------------------------------------------------------------|---------------------|---------------------|
|                | Methyne                                                                           | Solvents                                                                          | Thiophene rings                                                                    |                     |                     |
|                | Yb...C <sub>methyne</sub>                                                         | Yb...C <sub>DMSO</sub>                                                            | Yb...C <sub>3</sub>                                                                | Yb...C <sub>4</sub> | Yb...C <sub>5</sub> |
| <b>1</b>       | 3.652                                                                             | 4.196                                                                             | 5.856                                                                              | 6.793               | 6.526               |
|                | 3.680                                                                             | 4.855                                                                             | 5.839                                                                              | 6.846               | 6.551               |
|                | 3.627                                                                             |                                                                                   | 5.704                                                                              | 6.839               | 6.528               |
| <b>Average</b> | 3.653                                                                             | 4.526                                                                             | 5.866                                                                              | 6.826               | 6.535               |
| <b>2</b>       | 3.686                                                                             | 4.218                                                                             | 5.598                                                                              | 6.564               |                     |
|                | 3.726                                                                             | 4.224                                                                             | 5.778                                                                              | 6.715               |                     |
|                | 3.733                                                                             | 4.869                                                                             | 5.925                                                                              | 6.966               |                     |
|                |                                                                                   | 4.772                                                                             |                                                                                    |                     |                     |
| <b>Average</b> | 3.715                                                                             | 4.520                                                                             | 5.767                                                                              | 6.748               |                     |
